# Supplementary material for: Urban development criteria with a focus on resilience to pandemics: a case study of Corona Virus (Covid-19)
Source: Research Square preprint supplement (doi:10.21203/rs.3.rs-326544/v1), 2021-05-10
Supplement: Supplementary file 1 [file 68b5b9ff27b4e28e392e4bc6.docx]

**Highlights**

- At the time of pandemics, many public health issues require a new (or modified) perspective. Hence, when pandemics occur in cities and urban communities, vulnerabilities are much higher. Undoubtedly, resilience is necessary for every event and in every society.
- In other words, the city as a whole becomes a creature that needs to deal with emergencies at several different levels and sectors. By having a resilience plan (for example, in any action-based performance), the city can act more effectively in managing specific events and their negative effects on society.
- he recent unpleasant pandemic of Covid-19 has inspired us to understand resilience from various perspectives, as most of these perspectives are related to the critical state of the pandemic.
- Urban resilience has four main dimensions: 1) Economic, 2) Social, 3) Physical , 4) Institutional-managerial
